# Supplementary material for: Perivascular adipose tissue‐derived stromal cells contribute to vascular remodeling during aging
Source: PubMed Central journal article supplement (PMC6612678; doi:10.1111/acel.12969), 2019-05-14

Figure S1

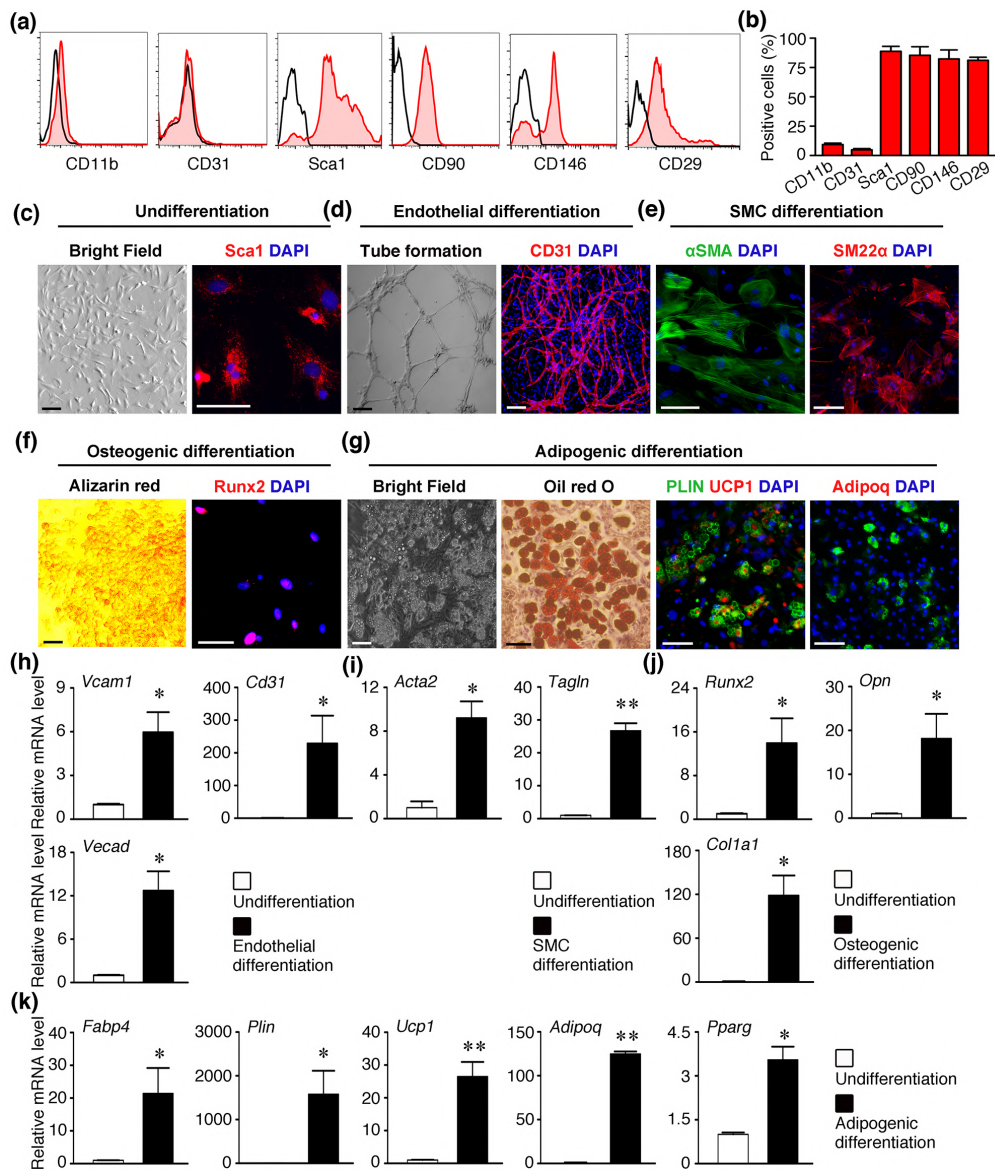

Figure S2

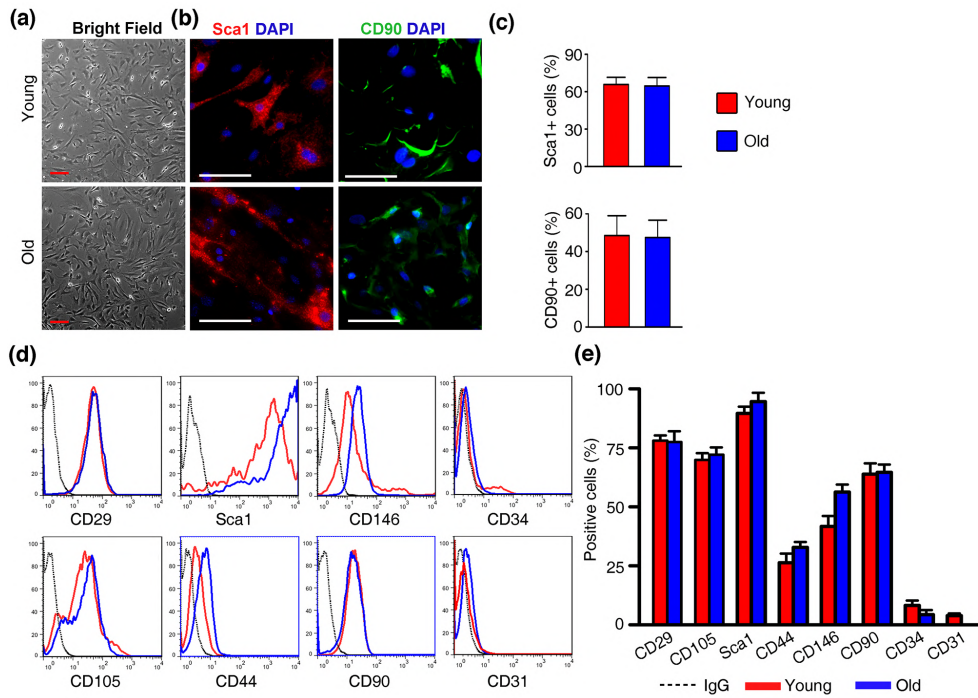

Figure S3

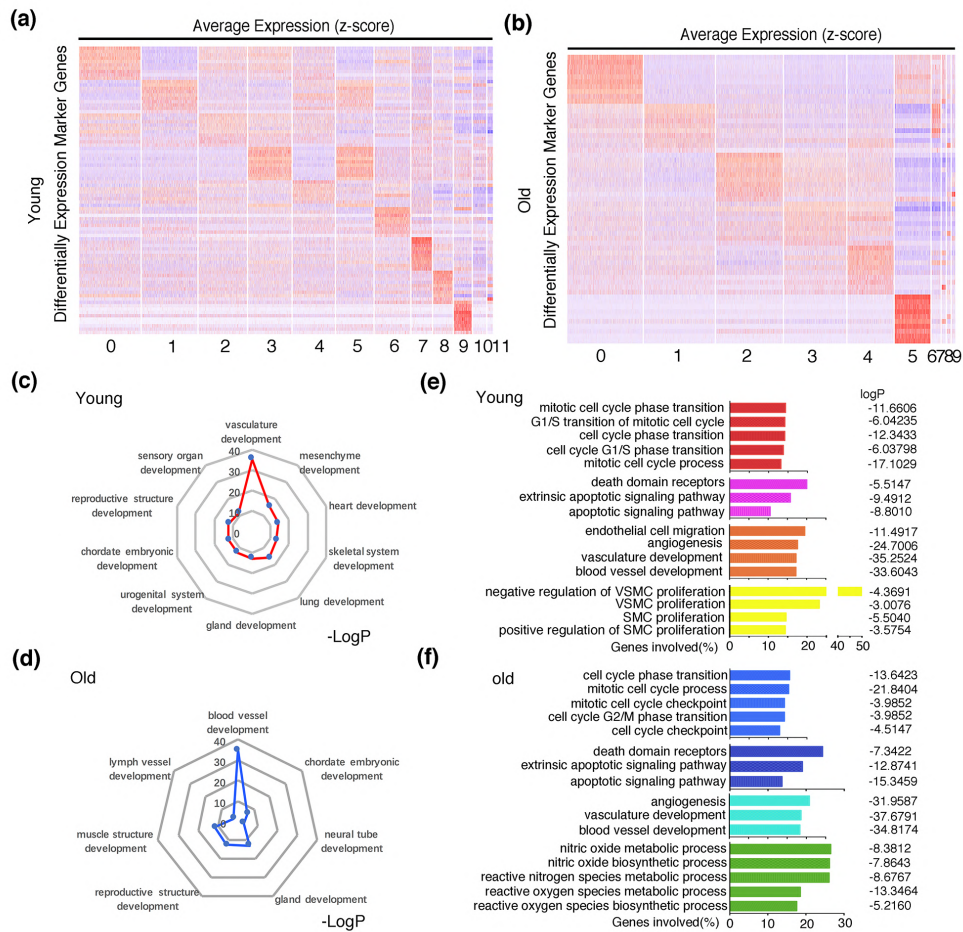

Figure S4

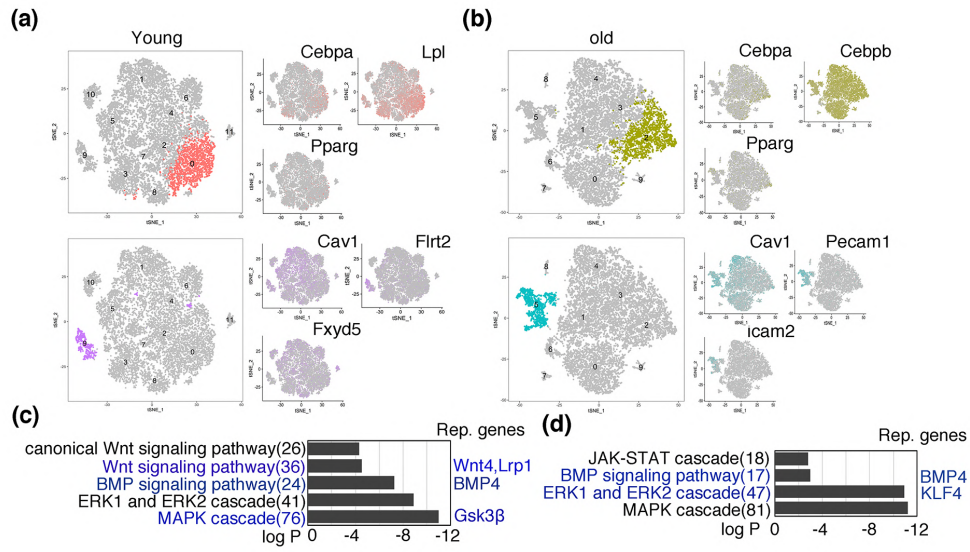

Figure S5

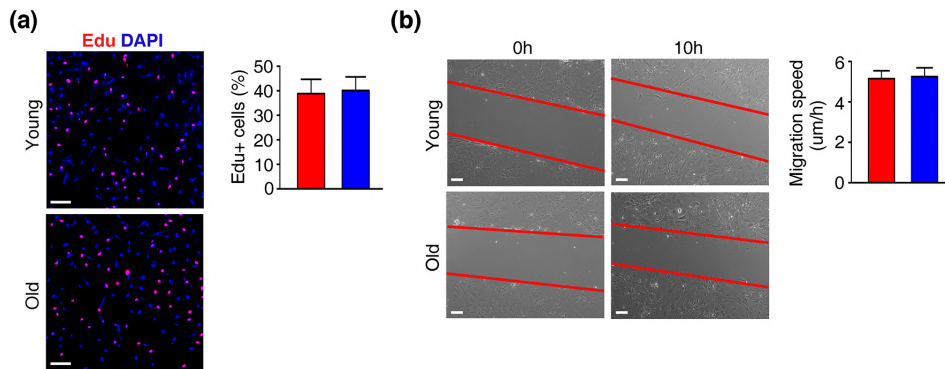

Figure S6

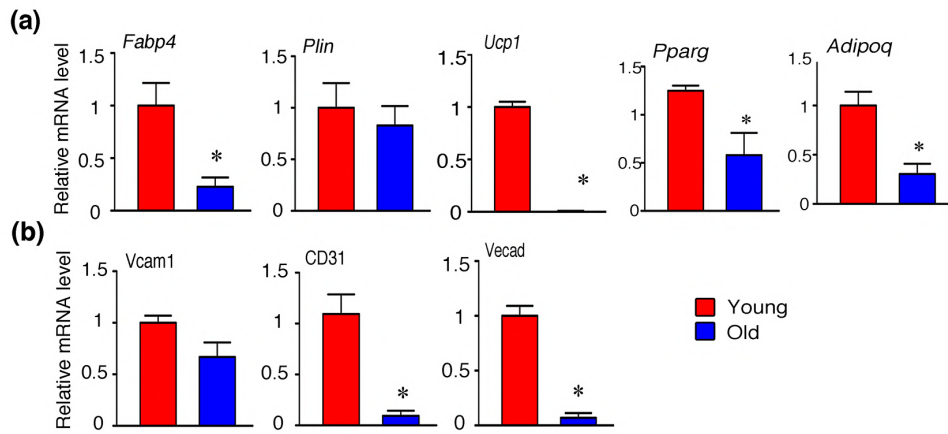



Figure S7

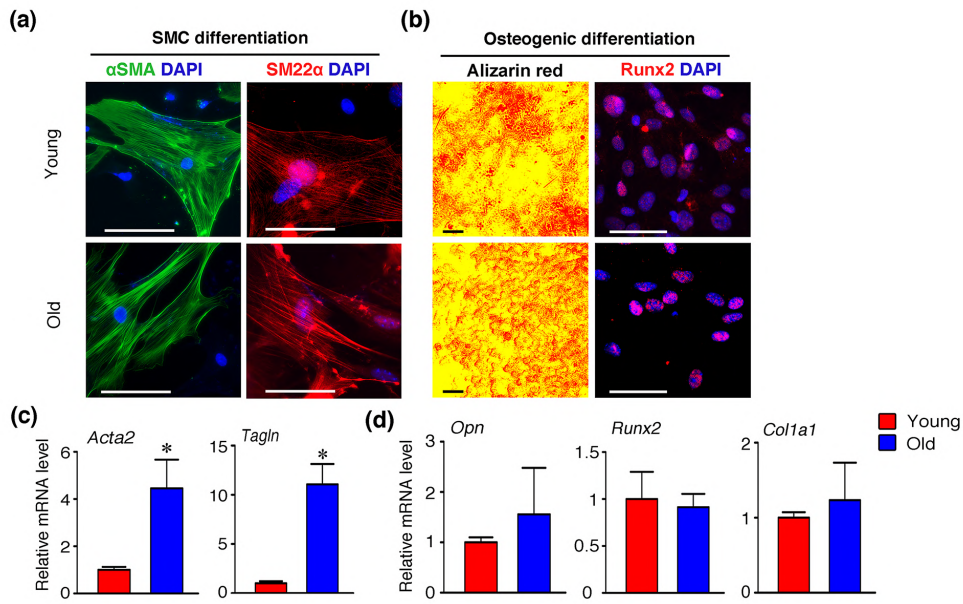

Figure S8

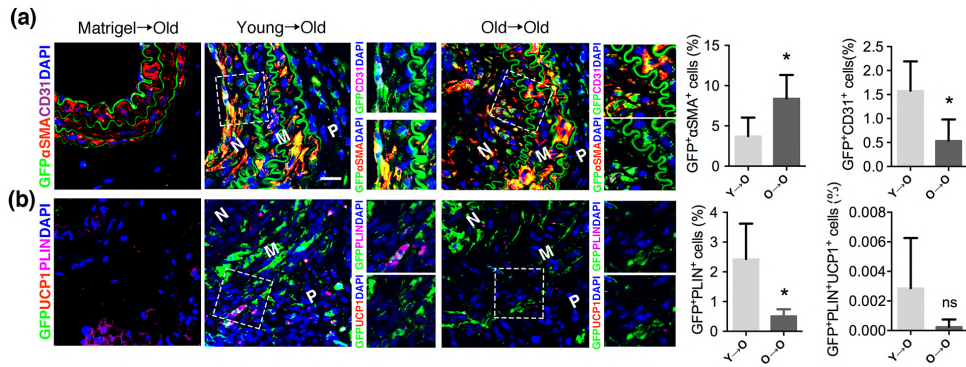

Figure S9

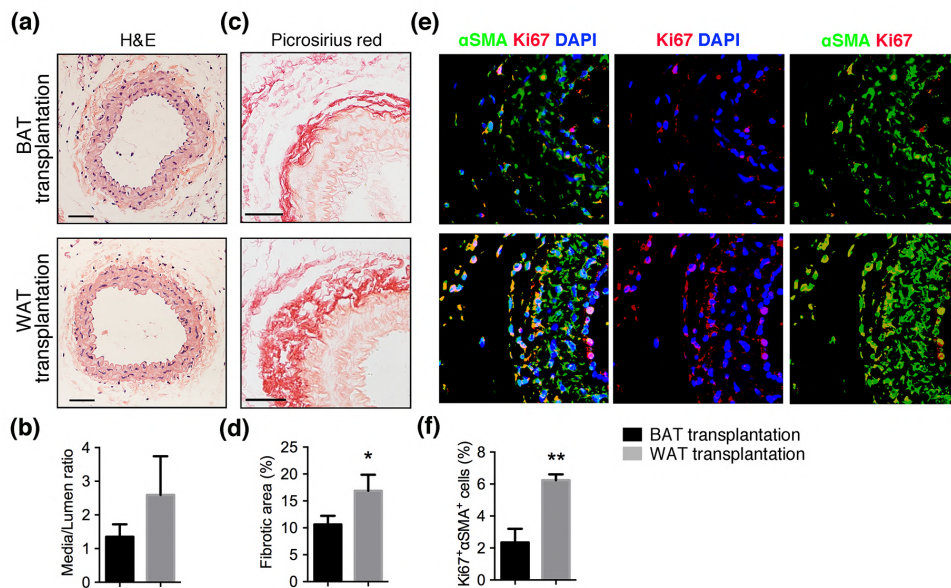

Figure S10

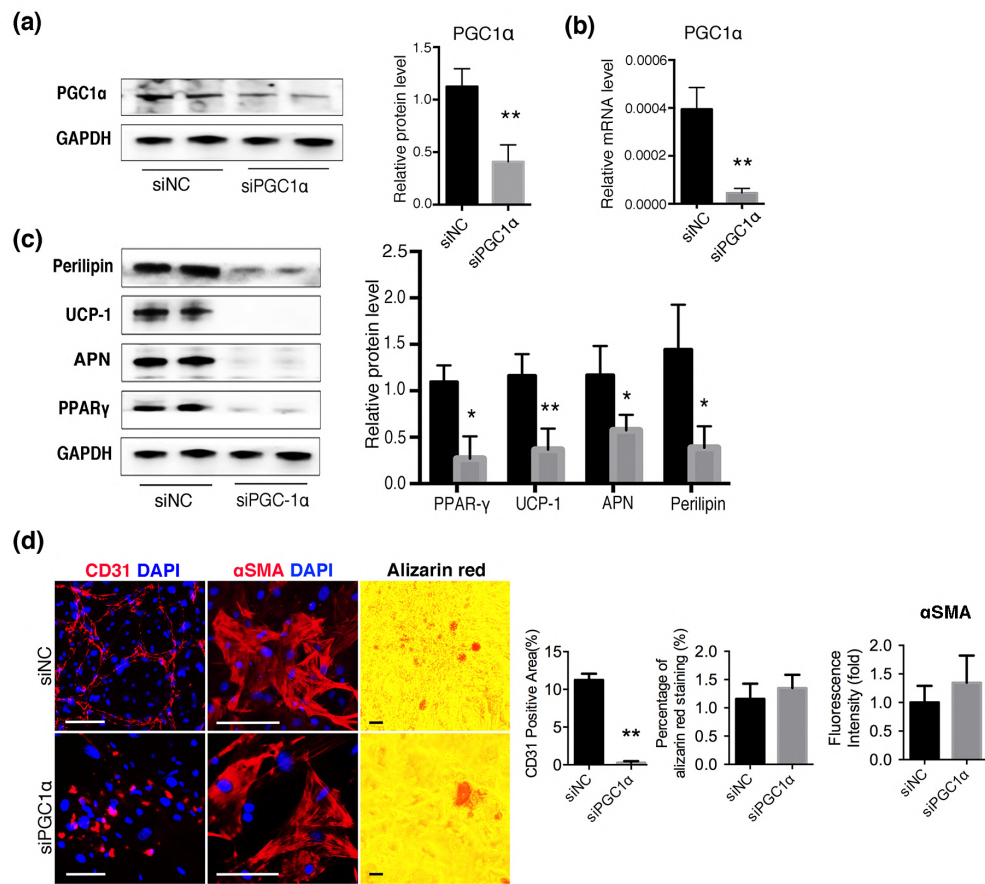

Figure S11

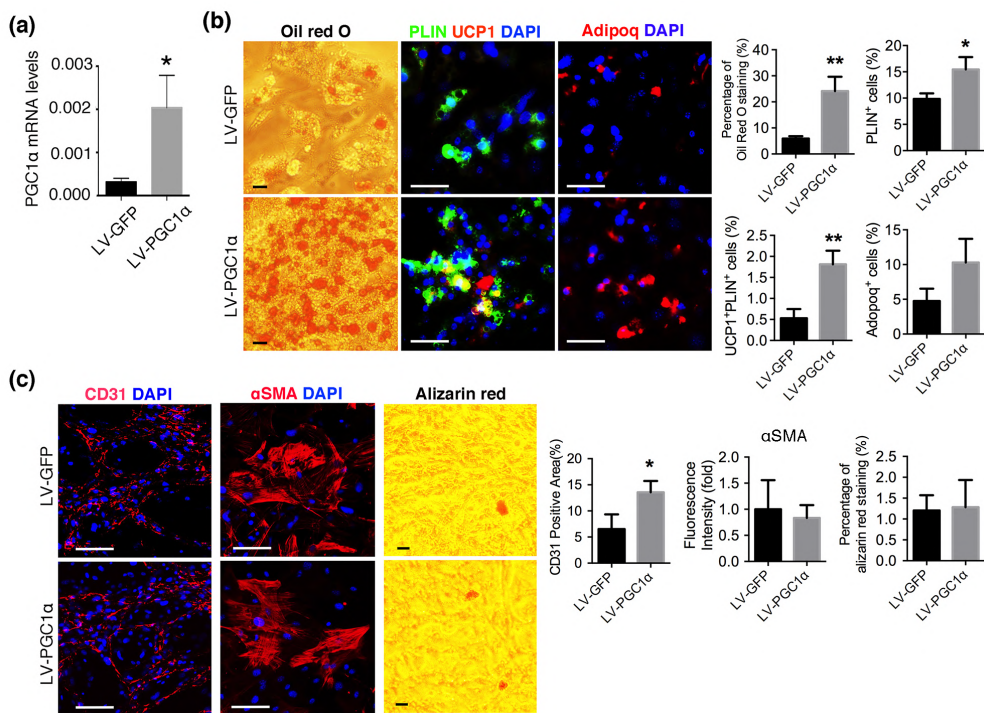

Figure S12

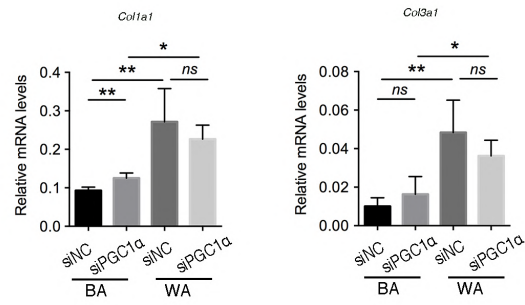

Figure S13

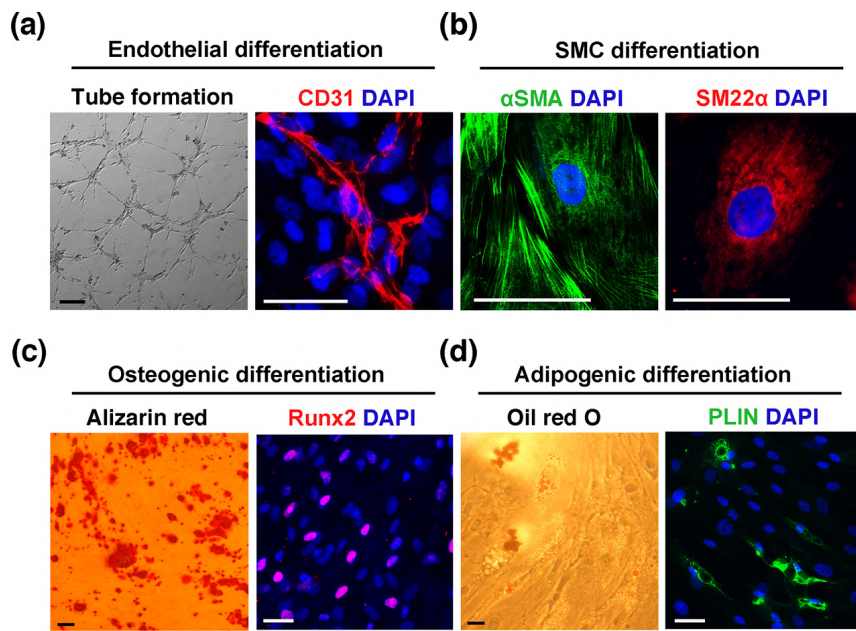

Figure S14

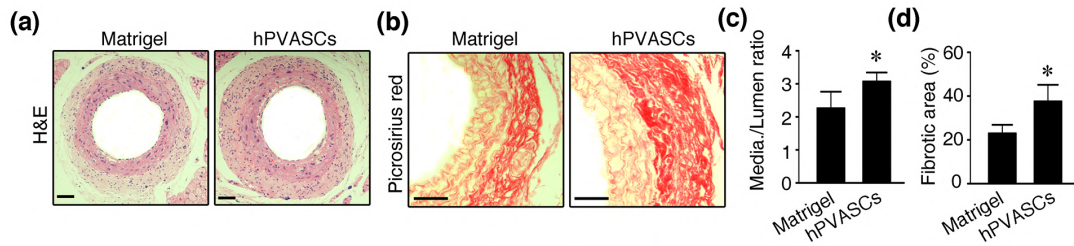

Supplement: ACEL-18-e12969-s001.pdf [file ACEL-18-e12969-s001.pdf]
