# Supplementary material for: Perivascular adipose tissue‐derived stromal cells contribute to vascular remodeling during aging
Source: PubMed Central journal article supplement (PMC6612678; doi:10.1111/acel.12969), 2019-05-14
Supplement: ACEL-18-e12969-s003.pdf [file ACEL-18-e12969-s003.pdf]

| No. | Age | Sex | BMI  | BP<br>(mmHg) | Dyslipidemia           | Diabetes | Cardiac<br>function | Diagnosis                                                                  | Medication                                       |
|-----|-----|-----|------|--------------|------------------------|----------|---------------------|----------------------------------------------------------------------------|--------------------------------------------------|
| 1   | 55  | M   | 24.1 | 138/64       | TG (2.22)<br>HDL(0.84) | +        | II                  | Aortic dissection                                                          | -                                                |
| 2   | 71  | M   | 24.1 | 127/55       | -                      | +        | II-III              | CHD triple vessel lesion                                                   | ACEI, Insulin                                    |
| 3   | 53  | M   | 21.1 | 160/62       | -                      | -        | III                 | Aneurysm of ascending aorta                                                | -                                                |
| 4   | 44  | M   | 22.5 | 133/82       | TG (4.73)<br>TC(5.03)  | -        | -                   | CHD triple vessel lesion                                                   | $\beta$ -blocker                                 |
| 5   | 79  | F   | 21.5 | 131/64       | TC(5.51)               | +        | II                  | CHD triple vessel lesion, Coronary<br>artery aneurysm                      | -                                                |
| 6   | 47  | M   | 27.5 | 133/76       | TG (3.63)<br>HDL(0.74) | -        | II                  | CHD triple vessel lesion                                                   | $\beta$ -blocker, Statin,<br>Aspirin, Clopidogel |
| 7   | 61  | F   | 21.9 | 112/78       | TC(5.16)               | -        | -                   | Congenital heart disease, Aortic<br>insufficiency                          | Anticoagulant                                    |
| 8   | 75  | F   | 19.1 | 115/67       | -                      | -        | -                   | CHD                                                                        | Diuretic, Anticoagulant                          |
| 9   | 73  | F   | 25.9 | 139/72       | -                      | +        | II                  | CHD triple vessel lesion,<br>Varicose veins of the left lower<br>extremity | spiro lactone                                    |
| 10  | 62  | M   | 19.6 | 140/82       | TG(1.85)               | -        | II                  | CHD, Postcholecystectomy                                                   | -                                                |
| 11  | 74  | M   | 20.8 | 113/77       | HDL(0.99)              | +        | III                 | CHD                                                                        | Diuretic, spiro lactone,<br>Metformin            |

|    |    |   |      |        |                       |   |         |                                  |                                       |
|----|----|---|------|--------|-----------------------|---|---------|----------------------------------|---------------------------------------|
| 12 | 58 | F | 21.5 | 120/77 | TC(6.53)<br>HDL(0.88) | - | II- III | CHD                              | Diuretic, spiro lactone               |
| 13 | 65 | M | 28.1 | 153/83 | TG(2.50)<br>TC(6.23)  | + | III     | CHD, Peripheral vascular disease | Diuretic, spiro lactone,<br>Metformin |

Table S2 The clinical characteristics of human samples.

BMI, Body mass index; BP, Blood pressure; M, Male; F, Female; TG, Triglyceride; TC: Total cholesterol; HDL, High density lipoprotein, CHD, Coronary heart disease.
